# Supplementary material for: Potassium caffeate/caffeic acid co-crystal: the rat race between the catecholic and carboxylic moieties in an atypical co-crystal
Source: Royal Society of Chemistry journal article supplement (doi:10.1039/c2dt31092a), 2012-01-01
Supplement: c2dt31092a.pdf [file c2dt31092a.pdf]

## Electronic Supplementary Information

### Potassium caffeate/caffeic acid co-crystal: the rat race between catecholic and carboxylic moiety in an atypical hybrid co-crystal

Giuseppe M. Lombardo<sup>a</sup>, Gustavo Portalone<sup>b</sup>, Ugo Chiacchio<sup>a</sup>, Antonio Rescifina<sup>a\*</sup> and Francesco Punzo<sup>a\*</sup>

<sup>a</sup> *Dipartimento di Scienze del Farmaco, Università degli Studi di Catania, Viale Andrea Doria 6, 95125, Catania, Italy*

<sup>b</sup> *Dipartimento di Chimica, "Sapienza" Università degli Studi di Roma, P.le A. Moro 5, 00185, Roma, Italy*

#### X-ray single crystal data:

$C_{18}H_{15}KO_8 \cdot H_2O$ ,  $M_r = 416,42$  triclinic, P-1,  $a = 9.7482(7) \text{ \AA}$ ,  $b = 10.2754(9) \text{ \AA}$ ,  $c = 10.5529(9) \text{ \AA}$ ,  $\alpha = 114.473(8)^\circ$ ,  $\beta = 108.182(7)^\circ$ ,  $\gamma = 95.313(7)^\circ$ ,  $V = 883.45(16) (\text{ \AA}^3)$ ,  $Z = 2$ ,  $\rho = 1.565 \text{ mg M}^{-3}$ ,  $\mu = 0.353 \text{ mm}^{-1}$ ,  $\lambda = 0.71069 \text{ \AA}$ ,  $T = 298(2) \text{ K}$ ,  $F(000) = 432$ , crystal size =  $0.20 \times 0.15 \times 0.12 \text{ mm}$ , 6402 reflections collected, 3084 reflections unique ( $R_{\text{int}} = 0.032$ ),  $\text{GoF} = 1.037$ ,  $R[F^2 > 2\sigma(F^2)] = 0.051$ ,  $wR(F^2) = 0.121$ , min/max residual density =  $-0.25/0.34 \text{ e \AA}^{-3}$ . Completeness to  $\theta (25.1^\circ) = 0.985$ .

**Table ST1** Molecular Dynamics Average values and estimated standard deviations (e.s.d.) attained by Model I and II from NPT simulation at 293 K of the Total, Potential and Kinetic Energies ( $\text{kcal mol}^{-1}$ ), and Shannon Entropy for and relative differences  $\Delta = E(\text{II}) - E(\text{I})$

|                  | Model I   |        | Model II  |        | $\Delta$ |        |
|------------------|-----------|--------|-----------|--------|----------|--------|
|                  |           | e.s.d. |           | e.s.d. |          | e.s.d. |
| $E_{\text{Tot}}$ | -7052.350 | 4.769  | -7094.935 | 4.706  | -42.585  | 6.700  |
| $E_{\text{Pot}}$ | -7679.954 | 14.115 | -7722.556 | 14.099 | -42.602  | 19.950 |
| $E_{\text{Kin}}$ | 627.604   | 13.641 | 627.621   | 13.652 | 0.015    | 19.299 |
| Entropy          | 1467.53   | 360.83 | 1390.82   | 372.79 | -76.72   | 518.68 |

**Table ST2** Estimated standard deviation (e.s.d.) of the adps of model I and II with respect to X-ray ones

|          | C1 $\rightarrow$ O4 | H2 $\rightarrow$ H41 | C1A $\rightarrow$ O4A | H2A $\rightarrow$ H4A1 | H <sub>2</sub> O | K      |
|----------|---------------------|----------------------|-----------------------|------------------------|------------------|--------|
| Model I  | 0.0123              | 0.0284               | 0.0073                | 0.0239                 | 0.0259           | 0.0162 |
| Model II | 0.0166              | 0.0283               | 0.0139                | 0.0157                 | 0.0366           | 0.0275 |

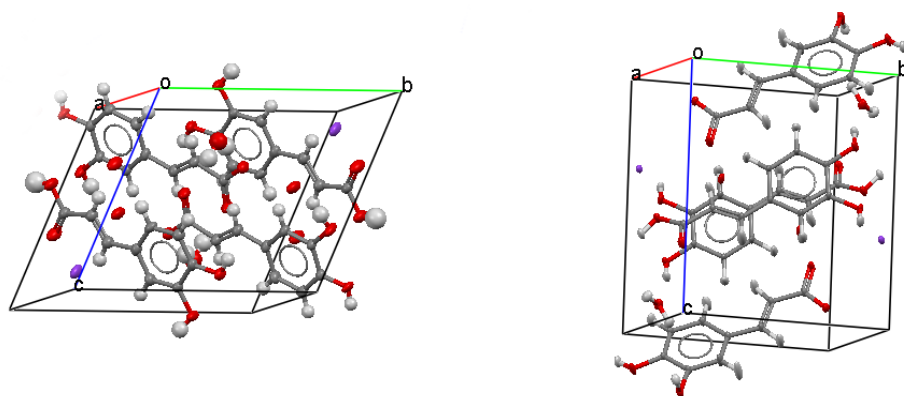

**Fig. SF1** X-ray structure (left) and model **II** one (right) unit cell.

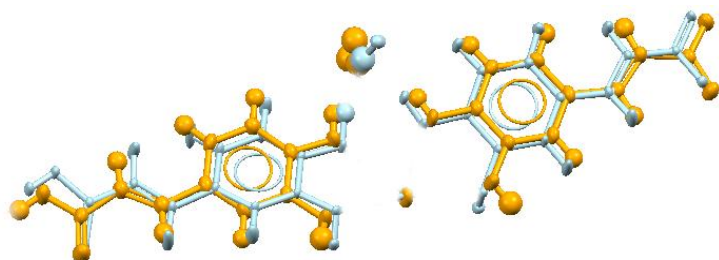

**Figure SF2** Superimposition of the asymmetric unit of the X-ray structure (orange) and model **II** (light blue). The position of the K ion is coincident and therefore resulted eclipsed.

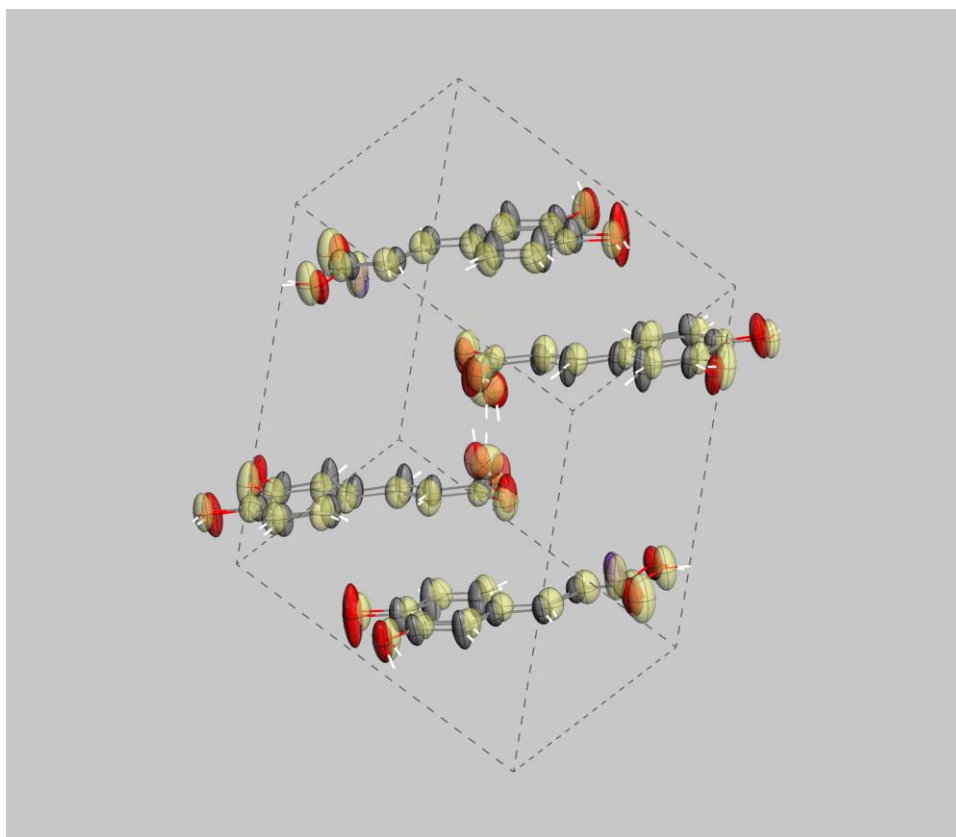

**Figure SF3** Superimposition of the experimental crystal packing with the model I MD averaged one. The experimental anisotropic thermal factors are shown (yellowish) and compared with the MD calculated ones (in red and gray for oxygen and carbons, respectively). The agreement in the anisotropic thermal factors is extended to the whole MD calculated super-cell and not only confined to the single unit fragment.

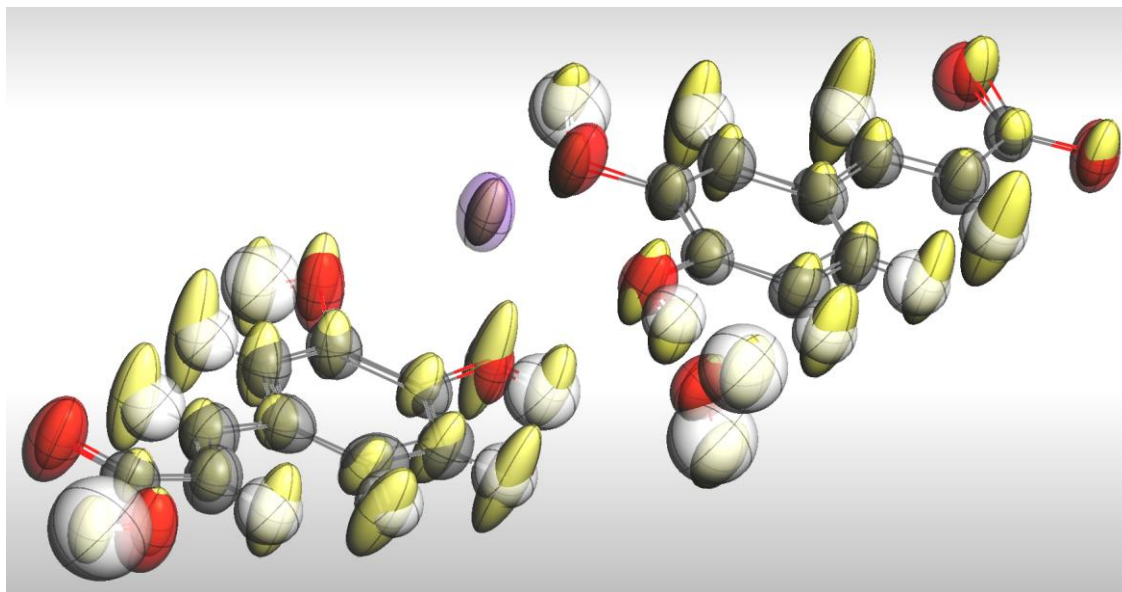

**Figure SF4** Superimposition of the whole asymmetric units (with displayed hydrogens, at difference with Figure 6 in the text) with the MD averaged ones of model I MD. The experimental anisotropic thermal factors are shown (in red and gray for oxygen and carbons, respectively) and compared with the MD calculated ones (yellowish).

### Structure II CIF

```
data_II
_audit_creation_date      2011-07-30
_audit_creation_method    ' '
_symmetry_space_group_name_H-M  'P-1'
_symmetry_Int_Tables_number  2
_symmetry_cell_setting    triclinic
loop_
_symmetry_equiv_pos_as_xyz
  x,y,z
  -x,-y,-z
_cell_length_a            8.1277
_cell_length_b            10.1980
_cell_length_c            10.6385
_cell_angle_alpha         85.8454
_cell_angle_beta          80.3161
_cell_angle_gamma         74.8444
loop_
_atom_site_label
_atom_site_type_symbol
_atom_site_fract_x
_atom_site_fract_y
_atom_site_fract_z
_atom_site_U_iso_or_equiv
_atom_site_adp_type
_atom_site_occupancy
K      K      0.14294  -0.01203   0.63554   0.01276   Uani   1.00
O1     O      0.62213  -0.09471  -0.68739   0.02045   Uani   1.00
O2     O      0.35784  -0.04405  -0.57173   0.01815   Uani   1.00
H21    H      0.34542   0.02748  -0.63868   0.02069   Uani   1.00
O3     O      0.99943  -0.83678  -0.53750   0.01598   Uani   1.00
H31    H      1.09519  -0.81291  -0.59510   0.01925   Uani   1.00
O4     O      0.88336  -0.83724  -0.28464   0.02069   Uani   1.00
H41    H      0.79158  -0.85815  -0.21989   0.02075   Uani   1.00
C1     C      0.51525  -0.12811  -0.60556   0.01330   Uani   1.00
C2     C      0.55310  -0.25630  -0.53665   0.01483   Uani   1.00
```

|      |   |          |          |          |         |      |      |
|------|---|----------|----------|----------|---------|------|------|
| H2   | H | 0.46652  | -0.26484 | -0.45321 | 0.04245 | Uani | 1.00 |
| C3   | C | 0.68902  | -0.35981 | -0.57602 | 0.01744 | Uani | 1.00 |
| H3   | H | 0.76477  | -0.34236 | -0.66417 | 0.04622 | Uani | 1.00 |
| C4   | C | 0.72533  | -0.48572 | -0.50216 | 0.01417 | Uani | 1.00 |
| C5   | C | 0.83999  | -0.60203 | -0.55859 | 0.01624 | Uani | 1.00 |
| H5   | H | 0.88813  | -0.60021 | -0.65789 | 0.03273 | Uani | 1.00 |
| C6   | C | 0.88996  | -0.72113 | -0.48497 | 0.01222 | Uani | 1.00 |
| C7   | C | 0.81952  | -0.72618 | -0.35580 | 0.01232 | Uani | 1.00 |
| C8   | C | 0.69776  | -0.61485 | -0.30088 | 0.01687 | Uani | 1.00 |
| H8   | H | 0.64480  | -0.62188 | -0.20247 | 0.03129 | Uani | 1.00 |
| C9   | C | 0.65155  | -0.49497 | -0.37360 | 0.02001 | Uani | 1.00 |
| H9   | H | 0.56418  | -0.41040 | -0.32673 | 0.04613 | Uani | 1.00 |
| O1A  | O | 0.44359  | 0.15090  | 0.12166  | 0.01512 | Uani | 1.00 |
| O2A  | O | 0.26171  | 0.17515  | 0.29475  | 0.02264 | Uani | 1.00 |
| O3A  | O | 0.32043  | 0.80445  | -0.23990 | 0.01526 | Uani | 1.00 |
| H3A1 | H | 0.39215  | 0.84668  | -0.19815 | 0.01932 | Uani | 1.00 |
| O4A  | O | 0.01191  | 0.94793  | -0.13426 | 0.02308 | Uani | 1.00 |
| H4A1 | H | -0.10905 | 0.98617  | -0.10000 | 0.02109 | Uani | 1.00 |
| C1A  | C | 0.31434  | 0.22076  | 0.18888  | 0.01269 | Uani | 1.00 |
| C2A  | C | 0.23139  | 0.35684  | 0.14966  | 0.01472 | Uani | 1.00 |
| H2A  | H | 0.12589  | 0.41005  | 0.21375  | 0.03839 | Uani | 1.00 |
| C3A  | C | 0.28696  | 0.41543  | 0.03904  | 0.01579 | Uani | 1.00 |
| H3A  | H | 0.39552  | 0.35309  | -0.01880 | 0.03725 | Uani | 1.00 |
| C4A  | C | 0.20775  | 0.55381  | 0.00237  | 0.01396 | Uani | 1.00 |
| C5A  | C | 0.29399  | 0.61163  | -0.10268 | 0.02234 | Uani | 1.00 |
| H5A  | H | 0.41313  | 0.55468  | -0.14931 | 0.05212 | Uani | 1.00 |
| C6A  | C | 0.22826  | 0.74474  | -0.14432 | 0.01356 | Uani | 1.00 |
| C7A  | C | 0.07106  | 0.82197  | -0.08360 | 0.01177 | Uani | 1.00 |
| C8A  | C | -0.01573 | 0.76810  | 0.02420  | 0.01513 | Uani | 1.00 |
| H8A  | H | -0.13299 | 0.82880  | 0.07426  | 0.03114 | Uani | 1.00 |
| C9A  | C | 0.05171  | 0.63389  | 0.06650  | 0.01553 | Uani | 1.00 |
| H9A  | H | -0.02193 | 0.59595  | 0.14621  | 0.03359 | Uani | 1.00 |
| O5   | O | 0.67563  | 0.07261  | -0.09641 | 0.01753 | Uani | 1.00 |
| H52  | H | 0.62393  | 0.00165  | -0.11729 | 0.02296 | Uani | 1.00 |
| H51  | H | 0.59558  | 0.10644  | -0.01963 | 0.02185 | Uani | 1.00 |

loop\_

\_atom\_site\_aniso\_label

\_atom\_site\_aniso\_U\_11

\_atom\_site\_aniso\_U\_22

\_atom\_site\_aniso\_U\_33

\_atom\_site\_aniso\_U\_12

\_atom\_site\_aniso\_U\_13

\_atom\_site\_aniso\_U\_23

|     |         |         |         |          |          |          |
|-----|---------|---------|---------|----------|----------|----------|
| K   | 0.01205 | 0.01053 | 0.01252 | 0.00110  | -0.00015 | 0.00169  |
| O1  | 0.01640 | 0.01662 | 0.02478 | -0.00337 | 0.00298  | 0.00506  |
| O2  | 0.01637 | 0.01447 | 0.01684 | 0.00339  | 0.00217  | 0.00556  |
| H21 | 0.02037 | 0.01493 | 0.01919 | 0.00347  | 0.00241  | 0.00670  |
| O3  | 0.01581 | 0.00943 | 0.01766 | 0.00034  | 0.00597  | -0.00067 |
| H31 | 0.01632 | 0.01447 | 0.02026 | 0.00097  | 0.00741  | 0.00127  |
| O4  | 0.01749 | 0.01622 | 0.01811 | 0.00671  | 0.00533  | 0.00681  |
| H41 | 0.02073 | 0.01544 | 0.01885 | 0.00150  | 0.00517  | 0.00492  |
| C1  | 0.01277 | 0.00996 | 0.01480 | -0.00049 | -0.00027 | 0.00181  |
| C2  | 0.01381 | 0.01118 | 0.01554 | 0.00136  | 0.00028  | 0.00273  |
| H2  | 0.03863 | 0.03030 | 0.03228 | 0.01740  | 0.01800  | 0.01794  |
| C3  | 0.01978 | 0.01115 | 0.01542 | 0.00283  | 0.00226  | 0.00197  |
| H3  | 0.05445 | 0.02489 | 0.03174 | 0.01587  | 0.02360  | 0.01218  |
| C4  | 0.01625 | 0.00983 | 0.01225 | 0.00229  | 0.00038  | 0.00016  |
| C5  | 0.01880 | 0.01093 | 0.01305 | 0.00262  | 0.00342  | 0.00094  |
| H5  | 0.04224 | 0.02226 | 0.01805 | 0.00776  | 0.01170  | 0.00419  |
| C6  | 0.01191 | 0.00866 | 0.01284 | 0.00037  | 0.00233  | -0.00013 |
| C7  | 0.01132 | 0.00996 | 0.01199 | 0.00171  | 0.00105  | 0.00072  |
| C8  | 0.02012 | 0.01323 | 0.01049 | 0.00549  | 0.00101  | -0.00007 |
| H8  | 0.04058 | 0.02446 | 0.01288 | 0.01258  | 0.00612  | 0.00234  |

|      |         |         |         |          |          |          |
|------|---------|---------|---------|----------|----------|----------|
| C9   | 0.02653 | 0.01304 | 0.01144 | 0.00780  | 0.00179  | -0.00019 |
| H9   | 0.06738 | 0.02466 | 0.01778 | 0.02625  | 0.01143  | 0.00310  |
| O1A  | 0.01508 | 0.01158 | 0.01526 | -0.00051 | 0.00236  | 0.00044  |
| O2A  | 0.02148 | 0.01473 | 0.02100 | 0.00411  | 0.00893  | 0.00863  |
| O3A  | 0.01190 | 0.01431 | 0.01578 | 0.00006  | 0.00081  | 0.00494  |
| H3A1 | 0.01363 | 0.01969 | 0.02260 | -0.00305 | -0.00094 | 0.00402  |
| O4A  | 0.01942 | 0.01657 | 0.02180 | 0.00683  | 0.00668  | 0.00881  |
| H4A1 | 0.01744 | 0.01475 | 0.02284 | 0.00482  | 0.00401  | 0.00365  |
| C1A  | 0.01167 | 0.00961 | 0.01405 | -0.00081 | 0.00128  | 0.00296  |
| C2A  | 0.01304 | 0.01091 | 0.01678 | -0.00049 | 0.00107  | 0.00464  |
| H2A  | 0.03258 | 0.02355 | 0.03722 | 0.01182  | 0.01873  | 0.01501  |
| C3A  | 0.01709 | 0.01080 | 0.01537 | 0.00010  | 0.00127  | 0.00403  |
| H3A  | 0.04188 | 0.02034 | 0.02882 | 0.01155  | 0.01685  | 0.01019  |
| C4A  | 0.01322 | 0.01059 | 0.01489 | -0.00029 | 0.00066  | 0.00369  |
| C5A  | 0.01824 | 0.01410 | 0.02392 | 0.00503  | 0.00830  | 0.00881  |
| H5A  | 0.03974 | 0.02835 | 0.05458 | 0.01968  | 0.03134  | 0.02347  |
| C6A  | 0.01118 | 0.01121 | 0.01456 | 0.00078  | 0.00095  | 0.00377  |
| C7A  | 0.01081 | 0.01018 | 0.01199 | 0.00015  | -0.00059 | 0.00162  |
| C8A  | 0.01336 | 0.01300 | 0.01480 | 0.00064  | 0.00200  | 0.00261  |
| H8A  | 0.02504 | 0.02314 | 0.03003 | 0.00779  | 0.01294  | 0.00673  |
| C9A  | 0.01387 | 0.01312 | 0.01574 | -0.00041 | 0.00183  | 0.00391  |
| H9A  | 0.02765 | 0.02468 | 0.03289 | 0.00471  | 0.01445  | 0.01389  |
| O5   | 0.01431 | 0.01547 | 0.02013 | -0.00331 | 0.00387  | 0.00002  |
| H52  | 0.02205 | 0.02068 | 0.02562 | -0.00790 | 0.00275  | -0.00315 |
| H51  | 0.01963 | 0.02075 | 0.02178 | -0.00377 | 0.00520  | -0.00326 |

loop\_

\_geom\_bond\_atom\_site\_label\_1

\_geom\_bond\_atom\_site\_label\_2

\_geom\_bond\_distance

\_geom\_bond\_site\_symmetry\_2

\_geom\_bond\_publ\_flag

|     |      |       |   |   |
|-----|------|-------|---|---|
| O1  | C1   | 1.219 | . | ? |
| O2  | H21  | 0.980 | . | ? |
| O2  | C1   | 1.348 | . | ? |
| O3  | H31  | 0.979 | . | ? |
| O3  | C6   | 1.369 | . | ? |
| O4  | H41  | 0.983 | . | ? |
| O4  | C7   | 1.351 | . | ? |
| C1  | C2   | 1.438 | . | ? |
| C2  | H2   | 1.049 | . | ? |
| C2  | C3   | 1.345 | . | ? |
| C3  | H3   | 1.063 | . | ? |
| C3  | C4   | 1.445 | . | ? |
| C4  | C5   | 1.405 | . | ? |
| C4  | C9   | 1.405 | . | ? |
| C5  | H5   | 1.064 | . | ? |
| C5  | C6   | 1.402 | . | ? |
| C6  | C7   | 1.400 | . | ? |
| C7  | C8   | 1.387 | . | ? |
| C8  | H8   | 1.068 | . | ? |
| C8  | C9   | 1.398 | . | ? |
| C9  | H9   | 1.058 | . | ? |
| O1A | C1A  | 1.246 | . | ? |
| O2A | C1A  | 1.239 | . | ? |
| O3A | H3A1 | 0.984 | . | ? |
| O3A | C6A  | 1.363 | . | ? |
| O4A | H4A1 | 0.975 | . | ? |
| O4A | C7A  | 1.355 | . | ? |
| C1A | C2A  | 1.441 | . | ? |
| C2A | H2A  | 1.053 | . | ? |
| C2A | C3A  | 1.344 | . | ? |
| C3A | H3A  | 1.069 | . | ? |
| C3A | C4A  | 1.445 | . | ? |

|     |     |       |   |   |
|-----|-----|-------|---|---|
| C4A | C5A | 1.395 | . | ? |
| C4A | C9A | 1.410 | . | ? |
| C5A | H5A | 1.052 | . | ? |
| C5A | C6A | 1.392 | . | ? |
| C6A | C7A | 1.393 | . | ? |
| C7A | C8A | 1.398 | . | ? |
| C8A | H8A | 1.069 | . | ? |
| C8A | C9A | 1.406 | . | ? |
| C9A | H9A | 1.063 | . | ? |
| O5  | H52 | 0.981 | . | ? |
| O5  | H51 | 0.977 | . | ? |
